# Supplementary material for: A ‘double-edged’ role for type-5 metabotropic glutamate receptors in pain disclosed by light-sensitive drugs
Source: eLife journal article supplement (doi:10.7554/elife.94931), 2024-07-22
Supplement: fig1-data1 [file Figure 1-source data 1.xlsx]

## Sheet: Tabelle1
Fig. 1. Neuropathic pain model and mGlu5 receptor signaling in different brain regions.
b - von Frey
		sham										CCI
	Ipsi	0.4	0.4	0.16	0.466667	0.6	0.16	0.533333	0.866667	0.6	0.6			0.16	0.16	0.06	0.07	0.06	0.07	0.16	0.13	0.07	0.07
	Contra	0.47	0.4	0.24	0.4	0.53	0.16	0.53	1	0.73	0.6			0.16	0.24	0.4	0.6	0.466667	0.24	0.16	0.4	0.733333	0.6
c - infralimbic cortex
		Vehicle									VU0360172
	sham	2931.12	4840.85	2694.15	2895.54	5549.39	4393.6							6718.78	9485.08	7252.88	1347.8	3271.98	4013.56	6099.71	16767	19930.2
	CCI	3013.57	2786.75	1099.25	2940.45	5194.69	3287.19							10958.6	7840.07	14579.3	14718.9	3102.75	12620.1
d - prelimbic cortex
		Vehicle									VU0360172
	sham	4679.89	2928.4	5556.19	1366.09	4350.53	2775.12	4150.85	4096.74	4153.71	1694.92	3380.7		4131.24	8143.63	8250.55	5652	2101.64	3558.33	10693.4	3645.18	3441	1919.41	2650.82	6112.27
	CCI	2564.86	6474.79	3190.64	4332.22	2778.23	7676.3	2572.03	2023.14	1477.81	6927.53	3954.86		9211.25	2685.51	8737.23	12317.7	6478	4632.44	9354.26	8998.6	13931.7	21076.4	4499.32	6461.75	3067.98
e - cingulate cortex
		Vehicle									VU0360172
	sham	1737.8	1720.8	366.005	1129.7	747.669								1437.24	1292.44	2322.23	2811.33
	CCI	570.832	313.214	488.554	527.52									1802.43	2259.87	1173.64	1807.79
f- amygdala
		Vehicle									VU0360172
	sham	361.664	436.835	129.676	357.015	326.415	428.6	508.754	188.252					95.6733	267.74	379.551	414.095	693.733	647.683	324.513	154.044
	CCI	341.28	42.7141	156.621	254.276	66.3916								425.317	367.684	742.179	860.967	453.899
g - thalamus
		Vehicle									VU0360172
	sham	4323.22	2046.73	2665.02	4828.86	3200.23	2996.8	5563.59	2350.64	2873.36	2435.94			5795.91	4939.34	9331.23	5895.38	5517.29	6425.76	4095.9	6986.97	6039.53	6916.08
	CCI	4171.58	3571.89	5495.33	4539.68	3409.01	9796.94	1716.81	2300.92	3699.49	3533.42			3584.45	6076.35	7493.93	5098.07	4127.83	8023.11	4452.67	5059.67	3962.68	5079.14
