# Supplementary material for: A ‘double-edged’ role for type-5 metabotropic glutamate receptors in pain disclosed by light-sensitive drugs
Source: eLife journal article supplement (doi:10.7554/elife.94931), 2024-07-22
Supplement: fig1-figsupp1-data1 [file Figure 1-figure supplement 1-source data 1.xlsx]

## Sheet: Tabelle1
mGlu5 receptor protein levels in different brain regions in sham and CCI mice.
a - infralimbic cortex
	sham	CCI
	0.960921	1.14738
	0.939458	1.72021
	0.766965	2.42901
	0.650153	2.69442
b - prelimbic cortex
	sham	CCI
	1.24089	1.58301
	1.8543	1.84068
	1.22256	1.61903
	1.67289	2.76472
c - cingulate cortex
	sham	CCI
	0.684309	1.29833
	0.996214	1.38366
	1.50832	1.41635
	1.14665	1.47179
d - amygdala
	sham	CCI
	1.70833	1.80461
	1.84896	1.72492
	1.52599	1.72209
	1.32015	1.23333
e - thalamus
	sham	CCI
	0.707754	1.62834
	1.73641	1.42781
	1.06158	2.38974
	0.89522	0.470781
		0.545385
