# Supplementary material for: A ‘double-edged’ role for type-5 metabotropic glutamate receptors in pain disclosed by light-sensitive drugs
Source: eLife journal article supplement (doi:10.7554/elife.94931), 2024-07-22
Supplement: fig2-data1 [file Figure 2-source data 1.xlsx]

## Sheet: Tabelle1
Fig. 2. Behavioral effects of light-induced manipulations of mGlu5 receptors in different brain regions in CCI mice.
d - infralimbic cortex
	JF-NP-26	Violet light
	0.07	0.16
	0.07	0.4
	0.07	0.4
	0.07	1
	0.04	0.07
	0.07	0.4
	0.16	0.16
	0.07	0.16
e - prelimbic cortex
	JF-NP-26	Violet light
	0.04	0.4
	0.07	0.4
	0.07	0.4
	0.16	0.4
	0.07	0.16
	0.04	0.16
	0.07	1
f - cingulate cortex
	JF-NP-26	Violet light
	0.16	0.4
	0.16	0.6
	0.07	0.16
	0.07	0.07
	0.16	0.16
	0.07	0.4
	0.16	1.4
	0.07	0.07
	0.07	0.16
	0.07	0.4
	0.07	0.16
g - amygdala
	JF-NP-26	Violet light
	0.16	0.04
	0.16	0.07
	0.07	0.008
	0.07	0.008
	0.16	0.16
	0.07	0.04
	0.07	0.04
	0.16	0.02
	0.07	0.07
	0.4	0.04
	0.16	0.04
h - thalamus
	JF-NP-26	Violet light
	0.16	0.6
	0.16	0.6
	0.16	0.4
	0.07	0.4
	0.07	0.4
	0.07	0.6
j - infralimbic cortex
	Pre-drug	Alloswitch-1	405 nm	525 nm
	0.07	0.16	0.04	0.16
	0.04	0.4	0.04	0.4
	0.07	0.4	0.04	0.4
	0.04	0.16	0.04	0.4
	0.16	0.6	0.07	0.4
	0.07	0.4	0.07	0.16
	0.07	0.4	0.07	0.16
k - prelimbic cortex
	Pre-drug	Alloswitch-1	405 nm	525 nm
	0.07	0.4	0.07	0.6
	0.07	0.4	0.07	0.4
	0.07	0.16	0.04	0.07
	0.07	0.4	0.07	0.07
	0.07	0.16	0.07	0.07
	0.07	0.4	0.07	0.4
	0.07	0.4	0.07	0.4
	0.07	0.4	0.07	0.4
	0.07	0.6	0.07	0.6
i - cingulate cortex
	Pre-drug	Alloswitch-1	405 nm	525 nm
	0.16	0.4	0.16	0.16
	0.07	0.4	0.6	0.4
	0.07	0.16	0.16	0.16
	0.07	0.16	0.16	0.16
	0.07	0.4	0.16	0.16
	0.16	0.4	0.07	0.07
	0.4	0.4	0.4	0.16
	0.07	0.16	0.07	0.16
m - amygdala
	Pre-drug	Alloswitch-1	405 nm	525 nm
	0.07	0.6	1	0.4
	0.07	0.4	0.6	0.4
	0.07	0.4	0.6	0.4
	0.16	0.4	0.6	0.6
	0.16	0.4	0.6	0.4
	0.07	0.16	0.4	0.16
n - thalamus
	Pre-drug	Alloswitch-1	405 nm	525 nm
	0.16	0.4	0.04	0.4
	0.07	0.4	0.16	0.4
	0.07	0.16	0.07	0.16
	0.07	0.4	0.07	0.16
	0.07	1	0.07	0.16
