# Supplementary material for: A ‘double-edged’ role for type-5 metabotropic glutamate receptors in pain disclosed by light-sensitive drugs
Source: eLife journal article supplement (doi:10.7554/elife.94931), 2024-07-22
Supplement: fig2-figsupp1-data1 [file Figure 2-figure supplement 1-source data 1.xlsx]

## Sheet: Tabelle1
Effects of light-induced blockade of mGlu5 receptors in different brain regions on mechanical pain thresholds in the unlesioned paw of CCI mice.
a - infralimbic cortex
	JF-NP-26	Violet light
	0.4	0.4
	0.4	0.4
	0.4	1
	0.4	1
	0.16	0.07
	0.4	0.4
	0.6	0.6
	0.6	0.6
b - prelimbic cortex
	JF-NP-26	Violet light
	1	2
	0.4	1
	1	0.6
	0.4	2
	0.6	0.6
	0.4	0.6
	0.6	2
c - cingulate cortex
	JF-NP-26	Violet light
	0.6	0.6
	0.6	1
	0.6	0.6
	0.6	0.4
	0.6	0.6
	0.6	1.4
	0.6	2
	0.6	0.4
	0.4	0.4
	0.4	0.6
	0.4	0.4
d - amygdala
	JF-NP-26	Violet light
	0.4	0.04
	0.6	0.16
	0.4	0.008
	0.4	0.008
	0.6	0.4
	0.4	0.16
	0.4	0.16
	0.6	0.07
	0.4	0.4
	1	0.16
	0.6	0.16
e - thalamus
	JF-NP-26	Violet light
	1	1.4
	0.4	0.6
	0.4	0.4
	0.4	0.6
	0.4	0.6
	0.6	0.6
