# Supplementary material for: A ‘double-edged’ role for type-5 metabotropic glutamate receptors in pain disclosed by light-sensitive drugs
Source: eLife journal article supplement (doi:10.7554/elife.94931), 2024-07-22
Supplement: fig2-figsupp2-data1 [file Figure 2-figure supplement 2-source data 1.xlsx]

## Sheet: Tabelle1
Effects of light-induced blockade of mGlu5 receptors in different brain regions on mechanical pain thresholds in the left paw of sham mice.
a				b			c			d			e
	JF-NP-26	Violet light		JF-NP-26	Violet light		JF-NP-26	Violet light		JF-NP-26	Violet light		JF-NP-26	Violet light
	1	1		0.4	0.4		50	50		95	95		102	102
	1	1		1	1		0.6	0.6		0.6	0.6		0.6	0.6
	1.4	1		0.6	1		0.4	0.6		1	1		1.4	1.4
	0.6	1		0.6	1		1	1.4		1	0.6		0.6	0.6
	1	1		1	1		1.4	1.4		1.4	1		1	1.4
	0.4	0.4		0.6	0.6		0.6	0.6		0.6	1		1	1
	0.4	0.4		0.4	0.4		1	1		1	1		0.4	0.4
	1	1		1	0.6		1	1		0.6	0.6		0.6	0.6
	0.6	0.6					1	1		1	1
	1	0.6
