# Supplementary material for: A ‘double-edged’ role for type-5 metabotropic glutamate receptors in pain disclosed by light-sensitive drugs
Source: eLife journal article supplement (doi:10.7554/elife.94931), 2024-07-22
Supplement: fig2-figsupp3-data1 [file Figure 2-figure supplement 3-source data 1.xlsx]

## Sheet: Tabelle1
Effects of light-induced blockade of mGlu5 receptors in in the right BLA on risk-taking and depressive-like behavior of sham and CCI mice
a						b						c						d
	Vehicle	Vehicle	JF-NP26	JF-NP26+light			Vehicle	Vehicle	JF-NP26	JF-NP26+light			Vehicle	Vehicle	JF-NP26	JF-NP26+light			JF-NP26	JF-NP26+light
	29	22	13	1			10	10	28	49			271	240	265	56			122	92
	23	30	15	7			56	72	8	125			222	279	238	88			117	117
	20	18	23	1			18	33	45	47			256	230	268	5			117	172
	27	18	18	4			22	21	17	21			257	290	202	70			117	69
	16	24	1	11			10	17	33	25			248	258	25	247			161	136
	19	14	4	10			37	24	22	27			286	204	16	157			119	134
	21	9	9	19			10	89	47	43			163	110	129	185			125	117
	24	0	6	15			8	9	14	34			180	0	150	185			128
	19	0	12	0			30	90	112	46			199	0	127	0			117
	12	13	15	6			47		34				129	171	113	100			125
		11	14	0					36					186	122	0			165
		21	28	10					58					223	143	103			139
		10	13	5					16					151	284	68
		24	21						173					233	177
			26						33						254
			18												154
			0												0
			22												310
			10												136
			9												123
			33												245
