# Supplementary material for: A ‘double-edged’ role for type-5 metabotropic glutamate receptors in pain disclosed by light-sensitive drugs
Source: eLife journal article supplement (doi:10.7554/elife.94931), 2024-07-22
Supplement: fig3-data1 [file Figure 3-source data 1.xlsx]

## Sheet: Tabelle1
Fig. 3. Electrophysiological effects of light-induced off/on-switch alloswitch-1 on prelimbic pyramidal neurons and amygdala feed-forward inhibition in neuropathic pain.
f - EPSCs
	ACSF	Alloswitch-1	Violet light	Green light
	255.829	324.806	386.039	405.128
	328.039	422.559	355.711	336.857
	226.784	269.575	207.431	253.403
	93.8053	158.888	138.226	126.645
	144.184	228.475	219.271	190.595
	95.1745	111.018	93.2668	114.335
	106.757	172.859	149.691	158.636
	103.208	135.671	98.6303	108.074
	346.202	335.367	282.1	298.807
	163.538	322.636	265.882	281.581
g - IPSCs
	ACSF	Alloswitch-1	Violet light	Green light
	104.085	126.973	185.845	144.365
	353.115	339.07	371.392	382.497
	480.344	397.423	481.351	442.428
	266.377	259.036	215.59	152.025
	371.704	487.627	419.795	395.945
	66.5311	68.8868	60.9379	58.9339
	143.215	188.862	180.709	167.779
	97.8109	99.1842	97.6022	101.772
	370.729	377.65	358.175	334.689
	163.007	199.985	174.262	177.495
h - ratio
	ACSF	Alloswitch-1	Violet light	Green light
	2.45789	2.55807	2.07721	2.80628
	0.928988	1.24623	0.957778	0.880679
	0.472129	0.678307	0.430935	0.572755
	0.352152	0.613382	0.641152	0.833054
	0.387899	0.468545	0.522329	0.481366
	1.43053	1.6116	1.53052	1.94006
	0.745429	0.915266	0.828354	0.945506
	1.05518	1.36787	1.01053	1.06192
	0.933843	0.888037	0.787604	0.89279
	1.00326	1.6133	1.52576	1.58642
n - IPSCs
	ACSF	Alloswitch-1	Violet light	Green light
	760.75	664.949	700.99	618.811
	64.6137	48.833	46.2201	35.5228
	31.7796	24.5464	30.5899	27.2336
	40.5633	24.081	81.4015	54.1773
	112.209	105.835	124.974	93.2721
	155.739	132.949	155.516	130.147
	313.236	237.987	359.962	305.405
	449.767	387.783	464.516	255.732
	632.624	536.296	556.715	585.883
	133.437	142.149	130.01	139.859
	305.773	214.906	234.354	300.622
	143.873	115.263	115.149	87.76
o - EPSCs
	ACSF	Alloswitch-1	Violet light	Green light
	104.926	119.842	110.506	111.965
	180.194	120.408	135.743	150.079
	85.9757	109.758	77.5212	89.7792
	42.309	75.1668	59.8978	72.5918
	302.281	263.467	163.071	203.445
	164.404	498.214	193.044	208.173
	233.88	275.657	315.512	255.634
	167.059	221.16	247.98	257.368
	165.122	168.643	133.58	135.829
	438.365	412.071	400.395	354.542
	130.839	158.309	122.545	125.679
	130.839	158.309	122.545	125.679
p - ratio
	ACSF	Alloswitch-1	Violet light	Green light
	3.04284	2.40401	3.24573	2.76393
	0.615804	0.407478	0.418259	0.317267
	0.176363	0.20386	0.225352	0.181462
	0.4718	0.219401	1.05005	0.60345
	2.65213	1.408	2.08645	1.28489
	0.515213	0.504613	0.95367	0.639716
	1.90529	0.47768	1.86466	1.46707
	1.92307	1.40676	1.47226	1.00038
	3.78684	2.42492	2.245	2.27644
	0.808112	0.842902	0.973271	1.02967
	0.697532	0.521527	0.585307	0.847916
	1.09962	0.728088	0.939649	0.698288
