# Supplementary material for: A ‘double-edged’ role for type-5 metabotropic glutamate receptors in pain disclosed by light-sensitive drugs
Source: eLife journal article supplement (doi:10.7554/elife.94931), 2024-07-22
Supplement: fig3-figsupp1-data1 [file Figure 3-figure supplement 1-source data 1.xlsx]

## Sheet: Tabelle1
Effects of light-induced blockade of mGlu5 receptors in prelimbic cortex on descending pain control (RVM) and on BLA-prelimbic circuitry in CCI mice.
b
	0	5	10	15	20	25	30	35	40	45	50	55
	37	26.33	20.67	23	18	15.33	18.67	17	17.33	9	13	15
	28.6	19	22	25	40.3	47.6	55	44	30.66	47	40	38
	20.3	15.7	18	16	20.33	20	24.6	23	14.6	17.6	12.5	14
	18.3	13.7	16	14	18.33	18	22.6	21	12.6	15.6	10.5	12
	26.6	17	20	23	38.3	45.6	53	42	28.66	45	38	36
e
	0	5	10	15	20	25	30	35	40	45	50	55
	6.77	6.23	6.29	6.33	6.49	6.82	6.73	6.8	7.02	7.27	7.83	7.69
	7.97	11.56	10.94	11.57	11.36	11.62	11.37	11.7	8	6	7	6
	5.14	10.31	8.21	9.13	8.77	10.05	9.93	10	10.27	10.7	9	8
	3.14	8.31	6.21	7.13	6.77	8.05	7.93	8	8.27	8.7	7	6
	13.5	12.8	12.9	14.5	13.7	12.7	14.6	13	14.1	12.6	13	12.5
	10.5	9.8	9.9	11.5	10.7	9.7	11.6	10	11.1	9.6	10	9.5
	16.38	15.68	15.78	17.38	16.58	15.58	17.48	15.88	16.98	15.48	15.88	15.38
	14.03	13.33	13.43	15.03	14.23	13.23	15.13	13.53	14.63	13.13	13.53	13.03
